# Supplementary material for: Tubulin Polyglutamylation by TTLL1 and TTLL7 Regulate Glutamate Concentration in the Mice Brain
Source: MDPI journal article supplement (doi:10.3390/biom13050784), 2023-05-01
Supplement: s1 [file s1]

## Article

# Tubulin Polyglutamylation by TTL1 and TTL7 Regulate Glutamate Concentration in the Mice Brain

Yashuang Ping<sup>1†</sup>, Kenji Ohata<sup>1,2†</sup>, Kenji Kikushima<sup>1,3</sup>, Takumi Sakamoto<sup>1</sup>, Ariful Islam<sup>1</sup>, Lili Xu<sup>1</sup>, Hengsen Zhang<sup>1</sup>, Bin Chen<sup>1</sup>, Jing Yan<sup>1</sup>, Fumihito Eto<sup>1</sup>, Chiho Nakane<sup>1</sup>, Keizo Takao<sup>4,5</sup>, Tsuyoshi Miyakawa<sup>5,6</sup>, Katsuya Kabashima<sup>1</sup>, Miho Watanabe<sup>7</sup>, Tomoaki Kahyo<sup>1,3</sup>, Ikuko Yao<sup>1,3,8</sup>, Atsuo Fukuda<sup>7</sup>, Koji Ikegami<sup>1,9</sup>, Yoshiyuki Konishi<sup>1,10</sup>, Mitsutoshi Setou<sup>1,3,11,\*</sup>

<sup>1</sup> Department of Cellular and Molecular Anatomy, Hamamatsu University School of Medicine, 1-20-1 Handayama, Higashi-ku, Hamamatsu, Shizuoka 431-3192, Japan

<sup>2</sup> Department of Gastroenterology, Graduate School of Medicine, The University of Tokyo, 7-3-1 Hongo, Bunkyo-ku, Tokyo 113-0033, Japan

<sup>3</sup> International Mass Imaging Center, Hamamatsu University School of Medicine, Hamamatsu, 1-20-1 Handayama, Higashi-ku, Hamamatsu, Shizuoka 431-3192, Japan

<sup>4</sup> Department of Behavioral Physiology, Faculty of Medicine, University of Toyama, 2630 Sugitani, Toyama-shi, Toyama 930-0194, Japan

<sup>5</sup> Genetic Engineering and Functional Genomics Unit, Frontier Technology Center, Graduate School of Medicine, Kyoto University, Kyoto 606-8501, Japan

<sup>6</sup> Institute for Comprehensive Medical Science Division of Systems Medicine, Fujita Health University, Aichi 470-1192, Japan

<sup>7</sup> Department of Neurophysiology, Hamamatsu University School of Medicine, Hamamatsu, 1-20-1 Handayama, Higashi-ku, Hamamatsu, Shizuoka 431-3192, Japan

<sup>8</sup> Department of Biomedical Sciences, School of Biological and Environmental Sciences, Kwansei Gakuin University, 1 Gakuen Uegahara, Sanda, Hyogo 669-1330, Japan

<sup>9</sup> Department of Anatomy and Developmental Biology, Graduate School of Biomedical and Health Sciences, Hiroshima University, 1-2-3 Kasumi, Hiroshima 734-8553, Japan

<sup>10</sup> Department of Applied Chemistry and Biotechnology, University of Fukui, 3-9-1 Bunkyo, Fukui-shi, Fukui 910-8507, Japan

<sup>11</sup> Department of Systems Molecular Anatomy, Institute for Medical Photonics Research, Preeminent Medical Photonics Education & Research Center, 1-20-1 Handayama, Higashi-ku, Hamamatsu, Shizuoka 431-3192, Japan

\* Correspondence: setou@hama-med.ac.jp; Tel.: +81-053-435-2086; Fax: +81-053-435-2468

† These authors contributed equally to this work.

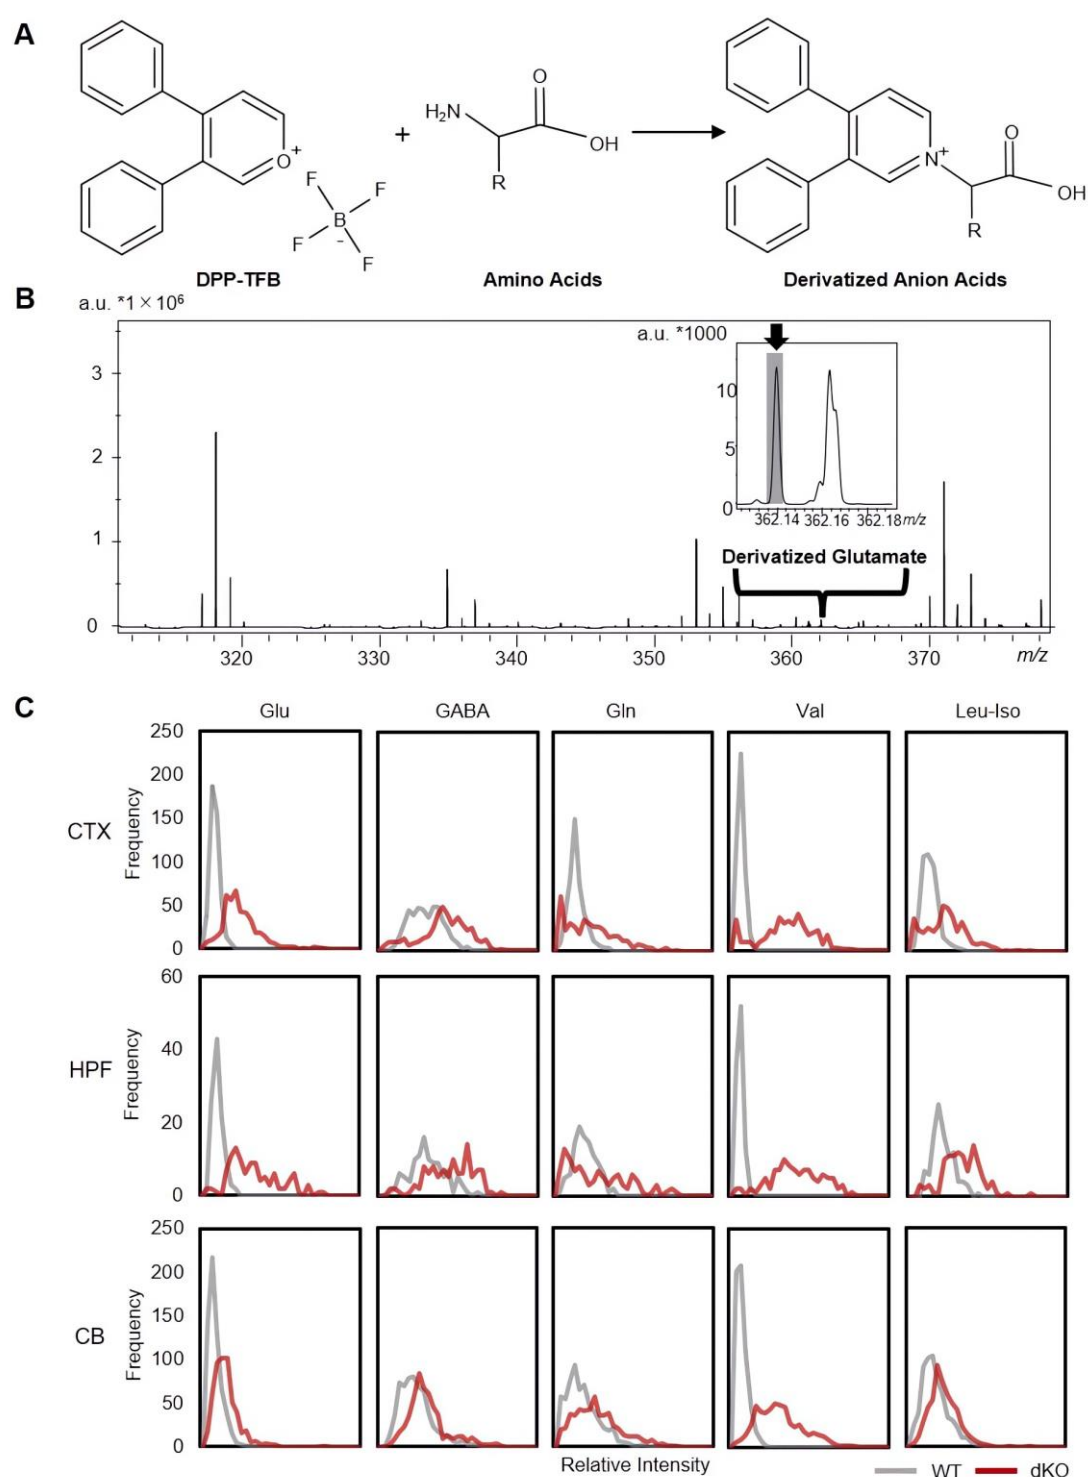

**Figure S1.** The derivatization of free amino acids by DPP-TFB and the relative intensity line graph of amino acid in the sagittal brain of mice sagittal brain. **(A)** Scheme of the derivatization of free amino acids by DPP-TFB. **(B)** The signal intensity of derivatized glutamate in brain tissues. **(C)** The frequency of the relative intensity of each spot in the selected regions of *Ttll1/Ttll7* double knockout and WT mice brains are represented in line graphs. Abbreviations: Glu: glutamate; GABA:  $\gamma$ -aminobutyric acid; Gln: glutamine; Val: valine; Leu-Iso: leucine-isoleucine; dKO: *Ttll1/Ttll7* double knockout.

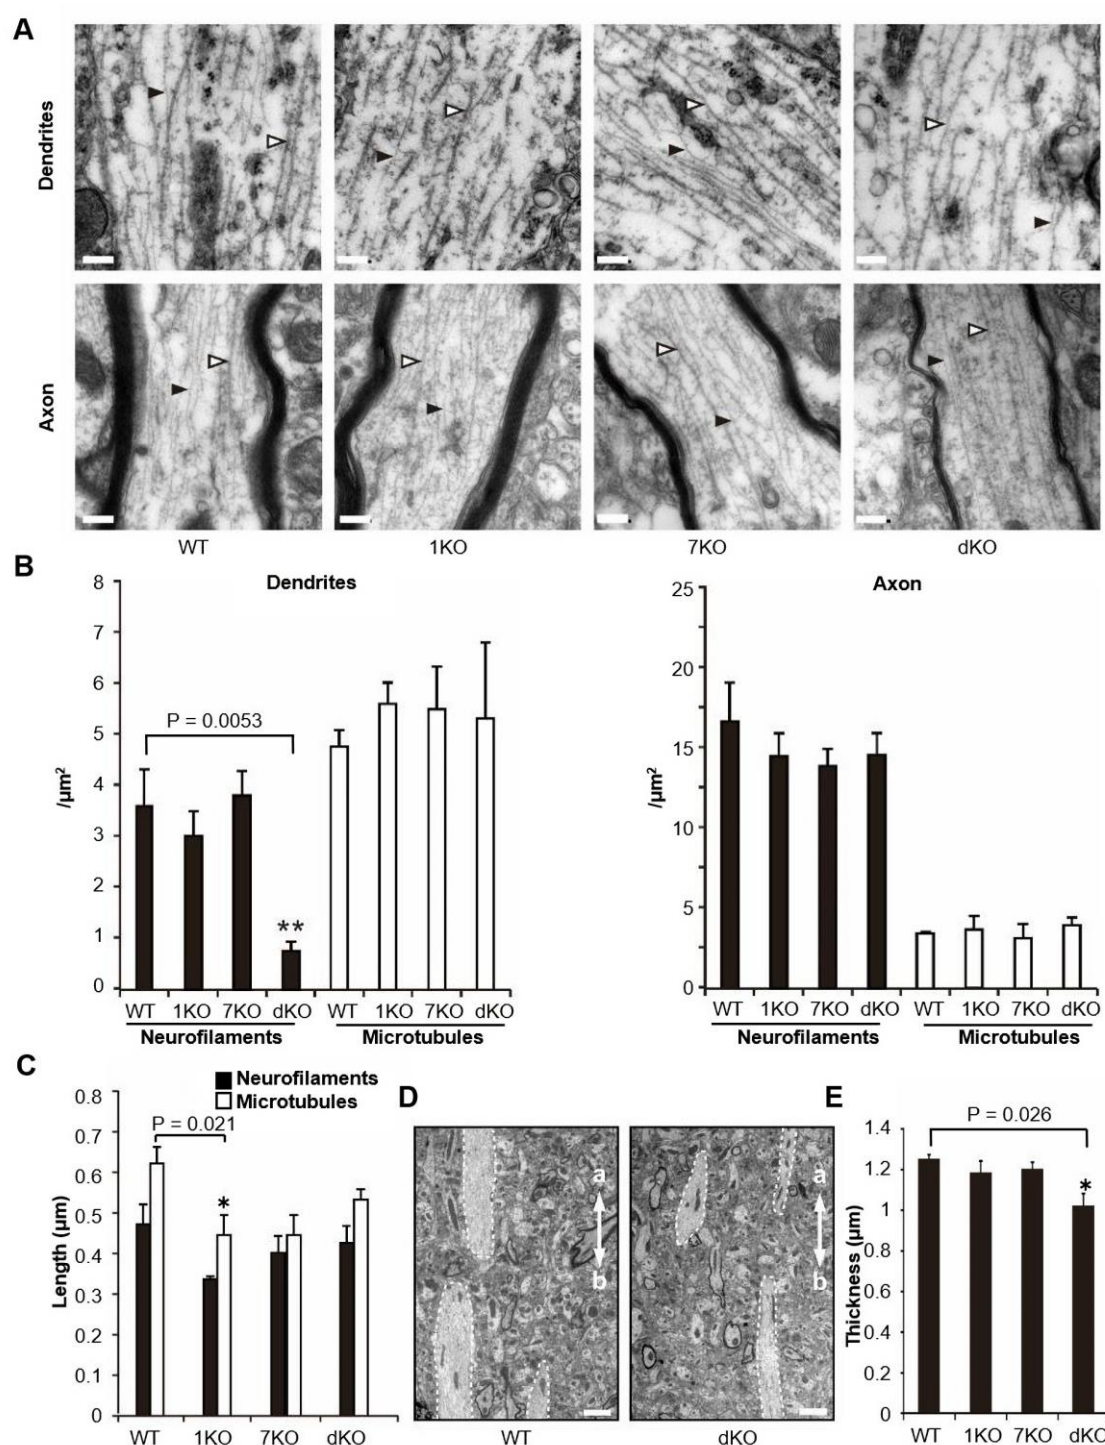

**Figure S2.** Electron microscopic observation of neurofilaments and microtubules in axons and dendrites of *Tll1* knockout mice. **(A)** Electron microscopic images of dendrites and axons from each transgenic mouse. Microtubules are pointed by white arrowheads, and neurofilaments are indicated by black arrowheads. Scale bars: 0.2  $\mu\text{m}$ . **(B)** Densities of neurofilaments and microtubules in dendrites or axons were counted from the microscopic images of the cerebral cortex at layer II/III from each transgenic mouse.  $p < 0.01$ , denoted by \*\*, (WT: 7 axons, 9 dendrites,  $n = 4$  mice; 1KO: 7 axons, 6 dendrites,  $n = 3$  mice; 7KO: 6 axons, 10 dendrites,  $n = 3$  mice; dKO: 8 axons, 15 dendrites,  $n = 4$  mice). **(C)** Neurofilament and microtubule lengths were calculated from EM images.  $p < 0.05$ , denoted by \*. **(D)** Images of the dendritic shafts from wild type and *Tll1/Tll7* double knockout mice. Dendrites regions are indicated by dashed lines and measured at the widest region. a: apical direction; b: basal direction. Scale bar 2  $\mu\text{m}$ . **(E)** The thickness of dendritic shafts from *Tll1/Tll7* double knockout mice was significantly reduced with  $p < 0.05$ , denoted by \* (WT: 111 dendritic shafts,  $n = 3$

mice; 1KO: 127 dendritic shafts,  $n = 3$  mice; 7KO: 116 dendritic shafts,  $n = 3$  mice; dKO: 132 dendritic shafts,  $n = 3$  mice). Data represented as mean  $\pm$  SD in B, C, F, ANOVA followed by Dunnett's test. Abbreviations: 1KO: *Till1* knockout; 7KO: *Till7* knockout; dKO: *Till1/Till7* double knockout.

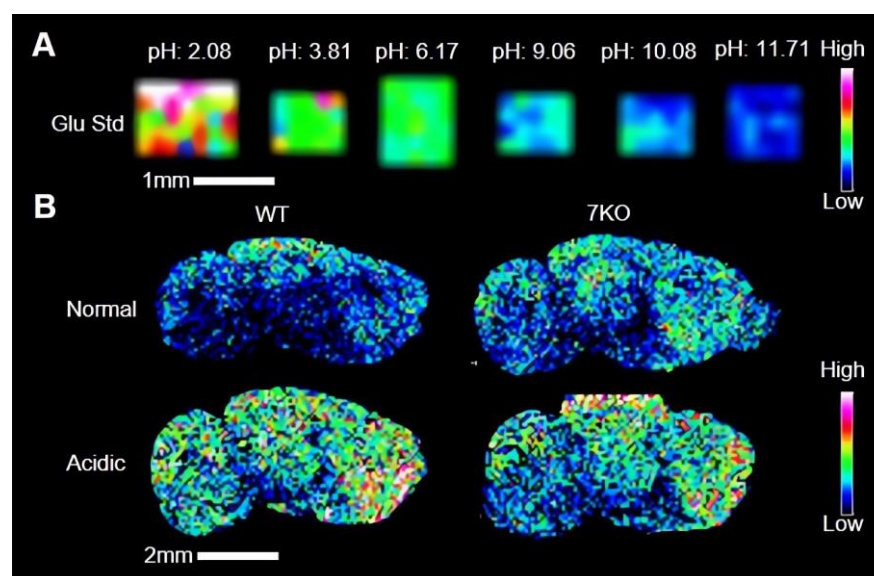

**Figure S3.** The detection efficiency of MALDI IMS for glutamate was influenced by pH. **(A)** Glutamate standard at different pH were detected by MALDI IMS, and the signal intensity of glutamate standards decreased with increasing pH. **(B)** Under normal conditions, glutamate concentrations in the brain of *Till7* knockout mice were higher than WT, but similar under acidic conditions. Abbreviations: Glu Std: Glutamate standard; 7KO: *Till7* knockout.

**Table S1.** MRM transitions and MS parameters for the analytes and IS of 4000 QTRAP MS/MS system.

| Analyte    | Precursor ion ( $m/z$ ) | Product ion ( $m/z$ ) | DP (V) | EP (V) | CE (V) | CXP (V) |
|------------|-------------------------|-----------------------|--------|--------|--------|---------|
| Glu        | 148.1                   | 84.0                  | 26     | 10     | 21     | 12      |
| IS-Glu     | 154.2                   | 89.1                  | 46     | 10     | 25     | 12      |
| DPP-Glu    | 362.1                   | 231.8                 | 106    | 10     | 39     | 16      |
| DPP-IS-Glu | 368.1                   | 232.9                 | 46     | 10     | 35     | 8       |

MRM transitions and MS parameters for the analytes and IS of 4000 QTRAP MS/MS system. Abbreviations: Glu: glutamate, IS-Glu internal standard glutamate, DPP-Glu: DPP-TFB derivatization glutamate, DPP-IS-Glu: DPP-TFB derivatization internal standard glutamate, DP: declustering potential, EP: entrance potential, CE: collision energy, CXP: collision cell exit potential.
